# Supplementary material for: Skin-resolved local bond contraction, core electron entrapment, and valence charge polarization of Ag and Cu nanoclusters
Source: Royal Society of Chemistry journal article supplement (doi:10.1039/c4cp00081a), 2014-01-01
Supplement: c4cp00081a1.pdf [file c4cp00081a1.pdf]

Supplementary Information

Title: Skin-resolved bond contraction, core electron entrapment, and valence charge polarization of Ag and Cu atomic clusters

Authors: Shideh Ahmadi, Xi Zhang, Yinyan Gong, Chin-Hua Chia, Chang Q. Sun

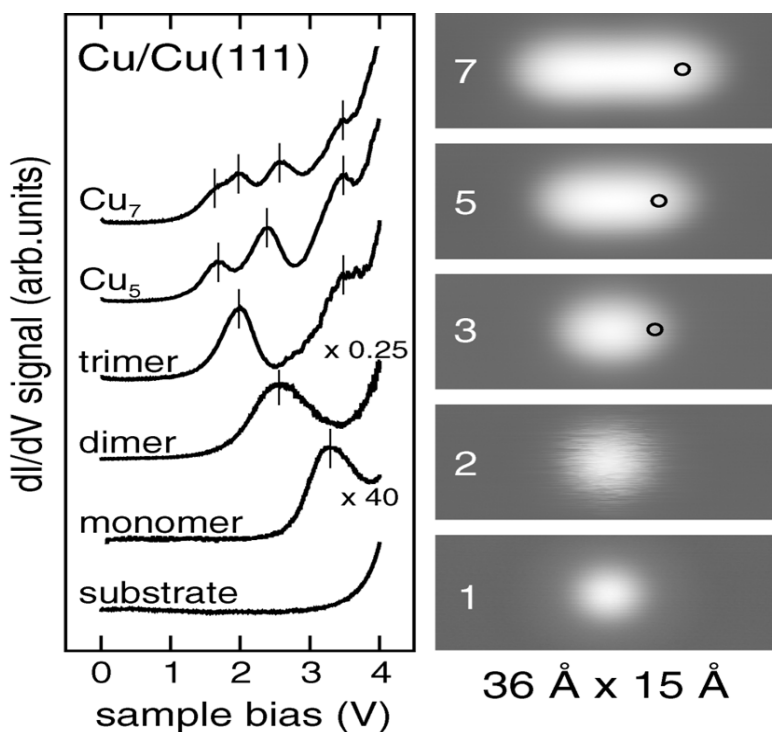

Fig. SI STS spectroscopy and STM imaging of  $Cu_N$  clusters<sup>1</sup> revealed the size-induced polarization with the LDOS of  $Cu_1$  (monomer) at 3.2 eV,  $Cu_2$  (dimer) at 2.6 eV, and  $Cu_3$  (trimer) at 2.0 eV. (Reprinted with permission from S. Fölsch, P. Hyldgaard, R. Koch, and K. H. Ploog, “Quantum confinement in monatomic Cu chains on Cu (111)”, *Phys. Rev. Lett.* **92**, 056803-056806 (2004). Copyright (2013) by the American Physical Society.)

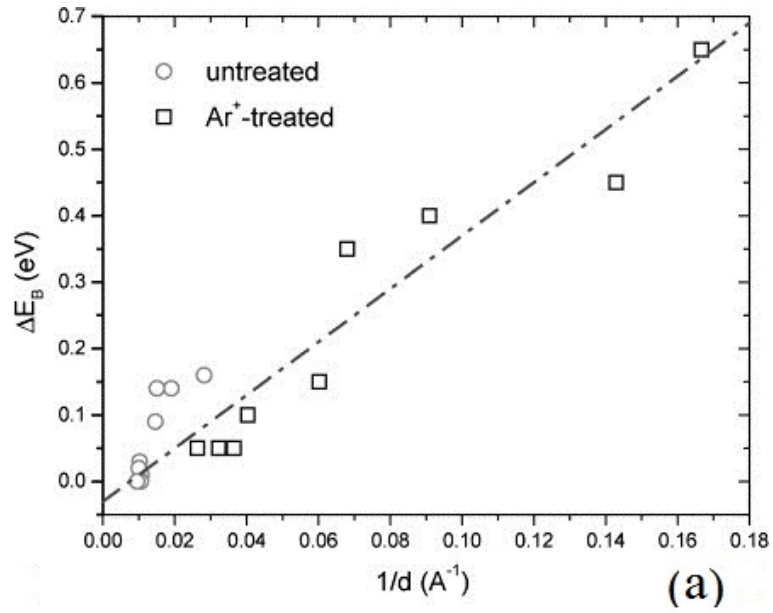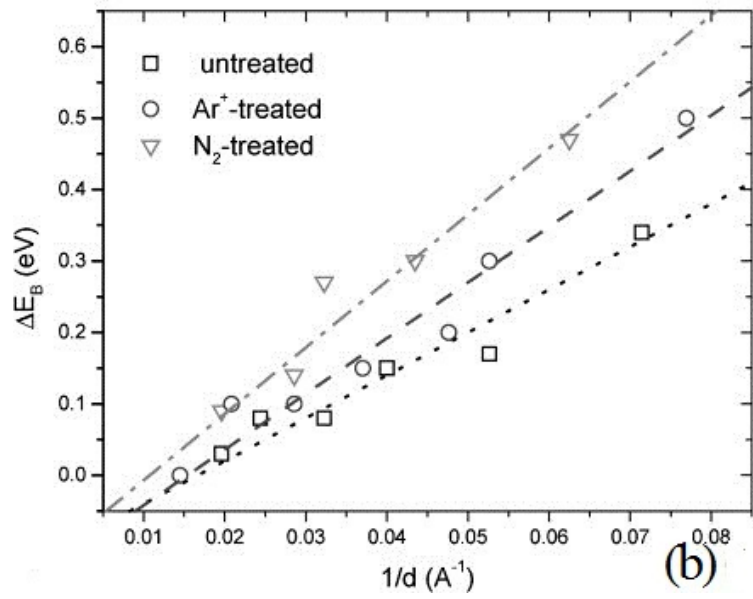

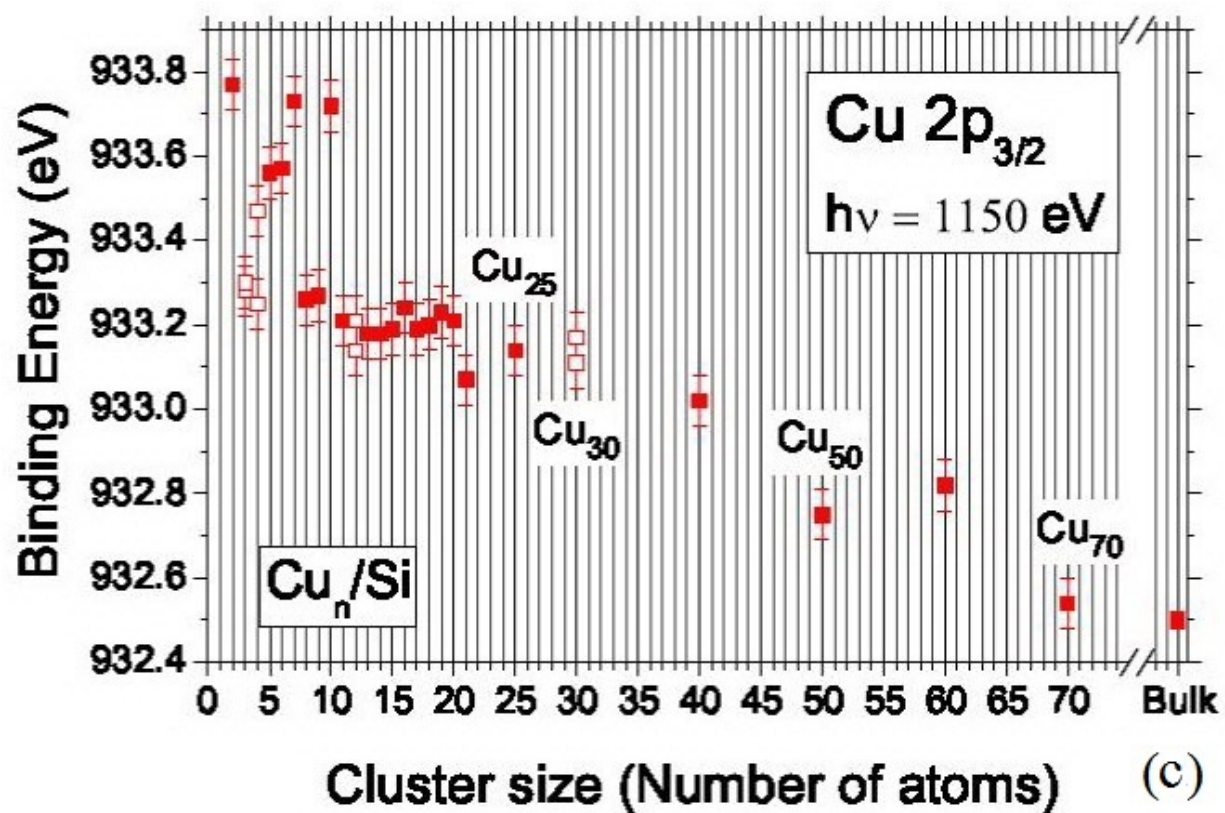

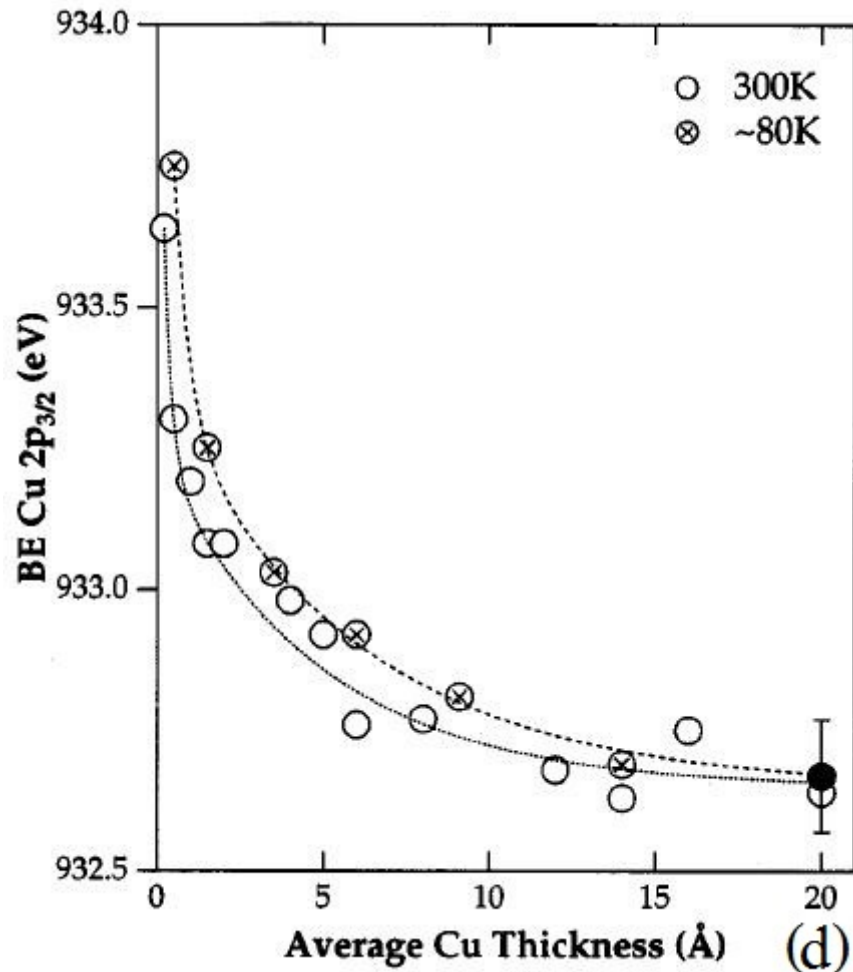

Fig. SII Measured of the core-level shift is versus the inverse of nanoparticles size of Cu on (a) highly ordered pyrolytic graphite (HOPG)/Ar<sup>+</sup> and (b) Dow Cyclotene 3022 (CYCL)/Ar<sup>+</sup> substrates,<sup>2</sup> (Reprinted permission from “Initial- and final-state effects on metal cluster/substrate interactions, as determined by XPS: copper clusters on Dow Cyclotene and highly oriented pyrolytic graphite”, D. Q. Yang and E. Sacher, Appl. Surf. Sci. **195**, 187-195 (2002) Copyright (2013) with permission from Elsevier.) (c) Binding energy of Cu-2p<sub>3/2</sub> measured by XPS spectra for Cu/Si substrate at various cluster sizes, which revealed Cu-band entrapment as the cluster size decreases,<sup>3</sup> (Reprinted permission from N. Ferretti, “X-ray photoelectron spectroscopy of size selected copper clusters on silicon”, (2009) with permission from N. Ferretti by Berlin library), and (d) Measured bonding energy as a function of Cu coverage on Al<sub>2</sub>O<sub>3</sub> substrate at 300K (open circle) and 80K (cross circle).<sup>4</sup> (Reprinted with permission from “Initial stages of Cu growth on ordered Al<sub>2</sub>O<sub>3</sub> ultrathin films”, Y. Wu, E. Garfunkel, and T. E. Madey, J. Vac. Sci. Technol., A **14**, 1662-1667 (1996). Copyright (2013) American Vacuum Society.)

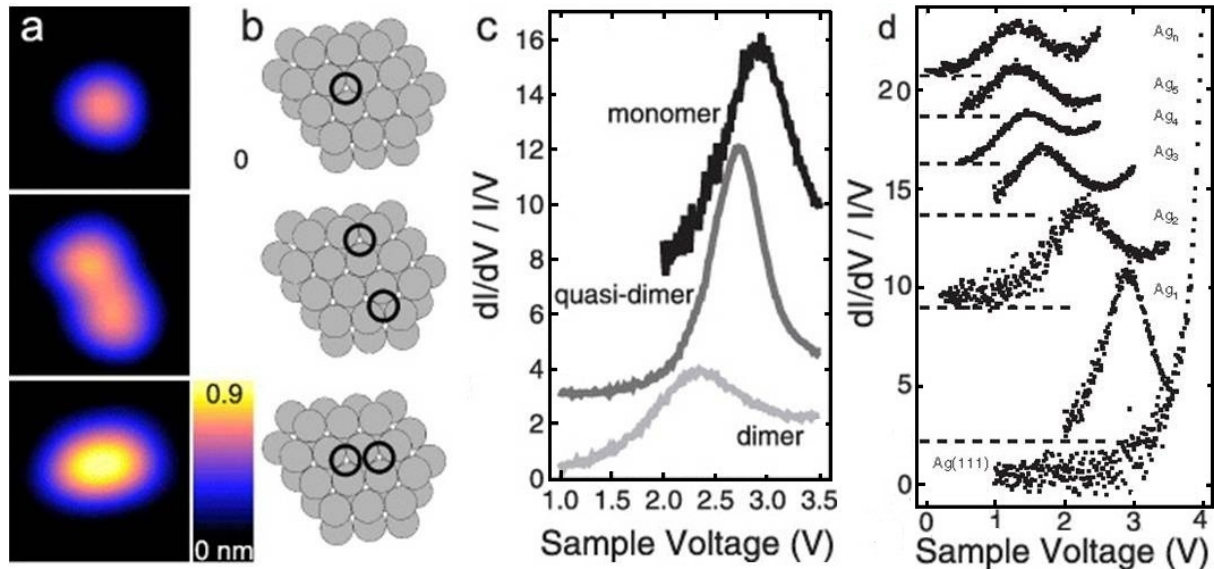

Fig.SIII (a) STM/S images for  $Ag_N$  clusters shows the unoccupied state polarization depend on the undercoordination, (b) Ag monomer, Ag quasi-dimer and  $Ag_2$  dimer on Ag(111) substrate, (c) the unoccupied states for the monomer, quasi-dimer, and dimer are positioned at 3.0, 2.7, and 2.4 eV, respectively,<sup>5</sup> (Reprinted with permission from “Evolution of unoccupied resonance during the synthesis of a silver dimer on Ag(111)”, *New J. Phys.* 11, 063020-063027 (2009). Copyright (2013), IOP Publishing & Deutsche Physikalische Gesellschaft. CC BY-NC-SA), and (d) normalized STS spectra obtained from clean Ag(111) surface and  $Ag_N$  ( $N=1-5, 10$ ) clusters. The respective zero of the spectra shows with dashed lines.<sup>6</sup> (Reprinted with permission from A. Sperl, J. Kröger, N. Néel, H. Jensen, R. Berndt, A. Franke, and E. Pehlke, “Unoccupied states of individual silver clusters and chains on Ag (111)”, *Phys. Rev. B* 77, 085422-085428 (2008). Copyright (2013) by the American Physical Society.)

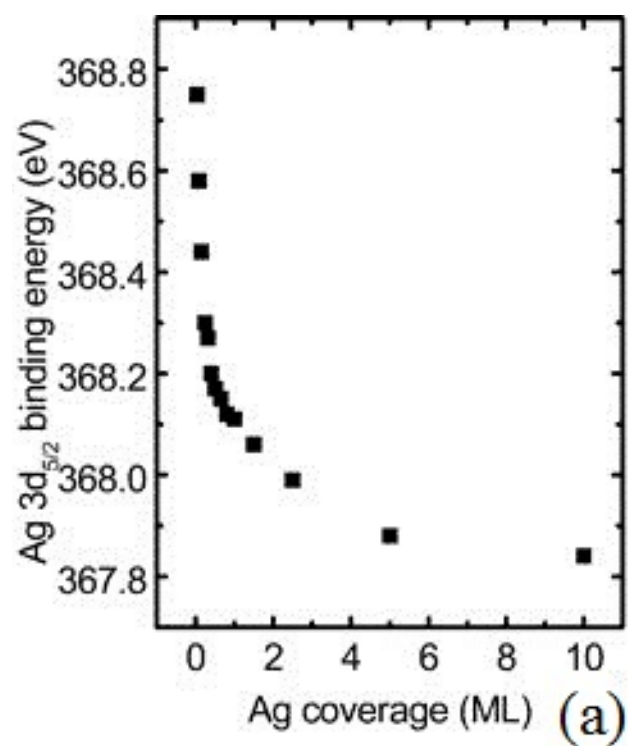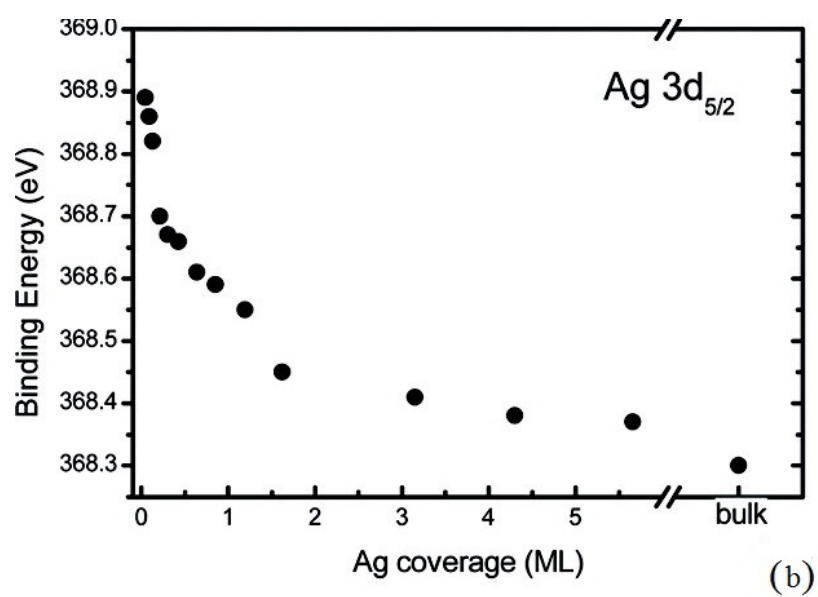

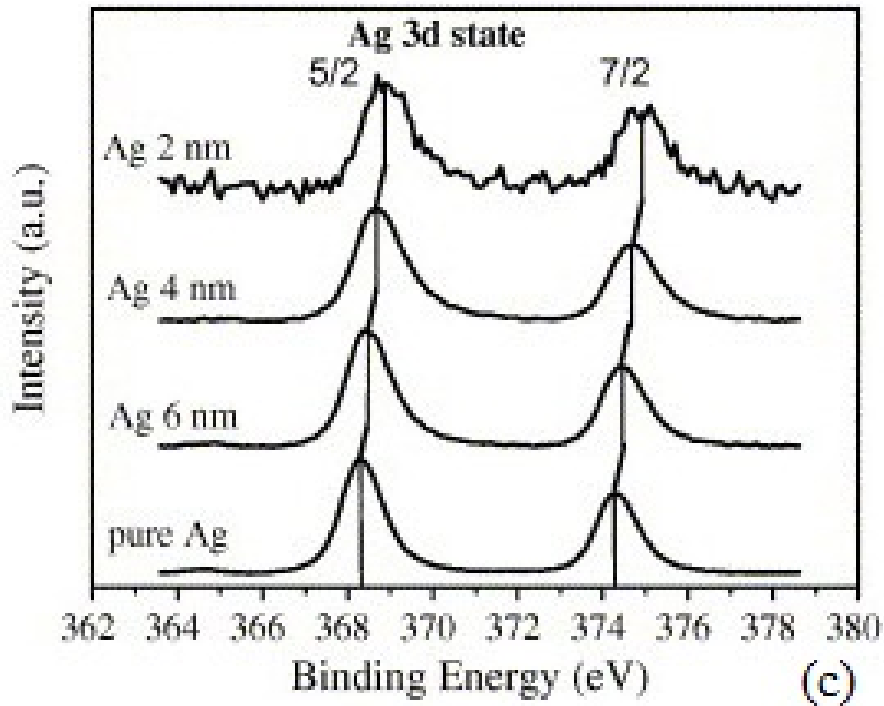

Fig. SIV XPS Ag-3d core level binding energy depended on the particle size for (a) Ag/Al<sub>2</sub>O<sub>3</sub>,<sup>7</sup> (Reprinted with permission from “The Growth of Silver on an Ordered Alumina Surface”, K. Luo, X. Lai, C. W. Yi, K. A. Davis, K. K. Gath, and D. W. Goodman, *J. Phys. Chem. B* **109**, 4064-4068 (2005). Copyright (2013) American Chemical Society.) (b) Ag/CeO<sub>2</sub>,<sup>8</sup> (Reprinted with permission from “Growth, Structure, and Stability of Ag on CeO<sub>2</sub>(111): Synchrotron Radiation Photoemission Studies”, D. Kong, G. Wang, Y. Pan, S. Hu, J. Hou, H. Pan, C. T. Campbell, and J. Zhu, *J. Phys. Chem. B* **109**, 6715-6725 (2005). Copyright (2013) American Chemical Society.) and (c) Ag/HOPG substrates.<sup>9</sup> (Reprinted with permission from I. Lopez-Salido, D. C. Lim, and Y. D. Kim, “Ag nanoparticles on highly ordered pyrolytic graphite (HOPG) surfaces studied using STM and XPS”, *Surface Science*, 588, 6-18 (2005). Copyright (2013) with permission from Elsevier.)

## References

- <sup>1</sup> S. Fölsch, P. Hyldgaard, R. Koch, and K. H. Ploog, *Physical Review Letters* **92**, 056803 (2004).
- <sup>2</sup> D. Q. Yang and E. Sacher, *Applied Surface Science* **195**, 187 (2002).
- <sup>3</sup> N. Ferretti, Technische Universität Berlin, 2008.

- 4 Y. Wu, E. Garfunkel, and T. E. Madey, *Journal of Vacuum Science and Technology A* **14**, 1662 (1996).
- 5 A. Sperl, J. Kröger, R. Berndt, A. Franke, and E. Pehlke, *New J. Phys.* **11**, 063020 (2009).
- 6 A. Sperl, J. Kröger, N. Néel, H. Jensen, R. Berndt, A. Franke, and E. Pehlke, *Physical Review B* **77**, 085422 (2008).
- 7 K. Luo, X. Lai, C. W. Yi, K. A. Davis, K. K. Gath, and D. W. Goodman, *The Journal of Physical Chemistry B* **109**, 4064 (2005).
- 8 D. Kong, G. Wang, Y. Pan, S. Hu, J. Hou, H. Pan, C. T. Campbell, and J. Zhu, *The Journal of Physical Chemistry C* **115**, 6715 (2011).
- 9 I. Lopez-Salido, D. C. Lim, and Y. D. Kim, *Surface Science* **588**, 6 (2005).
